1 **Draft Genome Sequences of 10 Strains of *Pseudomonas syringae* pv. *actinidiae***

2 **Biovar 1: A Major Kiwifruit Bacterial Canker Pathogen in Japan**

3

4 Takashi Fujikawa,<sup>a#</sup> Hiroe Hatomi,<sup>a</sup> Hiroyuki Sawada<sup>b</sup>

5

6 <sup>a</sup>Institute of Fruit Tree and Tea Science (IFTS), National Agriculture and Food Research

7 Organization (NARO), Tsukuba, Ibaraki, Japan

8 <sup>b</sup>Genetic Resources Center (GRC), NARO, Tsukuba, Ibaraki, Japan

9

10 Running Head: 10 Genome Sequences of *P. s.* pv. *actinidiae* Biovar 1

11

12 <sup>#</sup>Address correspondence to Takashi Fujikawa, [ftakashi@affrc.go.jp](mailto:ftakashi@affrc.go.jp)

---

13 **Abstract**

14 Several groups (biovars) of the kiwifruit bacterial canker pathogen, *Pseudomonas*  
15 *syringae* pv. *actinidiae*, are found in Japan. Here, we sequenced and compared the 10  
16 genomes of biovar 1, the major group in Japan, which is known as the phaseolotoxin  
17 producer.

18

19 The kiwifruit bacterial canker pathogen, *Pseudomonas syringae* pv. *actinidiae* (Psa),  
20 was first described in Japan in 1989 (1). Subsequently, Psa was found in other  
21 kiwifruit-producing countries (2). Based on comparative analyses (2–4), Psa was  
22 categorized into several groups (biovars). The first Japanese group was named biovar 1  
23 (Psa1), which was also later found in Italy and Korea. This biovar produces  
24 phaseolotoxin (2), a phytotoxin that inhibits arginine biosynthesis in host plants and  
25 results in bacterial canker symptom development. On the Psa1 chromosome, a large  
26 number of genes involved in phaseolotoxin biosynthesis are accumulated in an  
27 approximately 23 kb region (*argK-tox* cluster), which is contained in an exogenous  
28 genomic island (*tox* island) that Psa1 acquired in the past (2). However, some Psa1  
29 strains found in Ehime Prefecture, Japan (the Ehime isolates) do not produce  
30 phaseolotoxin, although they seem to possess the *argK-tox* cluster (5). On the other  
31 hand, several Psa1 strains preserved in the NARO Genebank  
32 ([https://www.gene.affrc.go.jp/index\\_en.php](https://www.gene.affrc.go.jp/index_en.php)) may lack this cluster (2). Here, we selected  
33 10 strains (Table 1) that represent Psa1 diversity and conducted comparative genome  
34 analyses.

35 Genomic DNA was extracted from the strains using the DNeasy mini kit (Qiagen,  
36 Hilden, Germany). Genomic DNA was sequenced using an Ion PGM sequencer with an  
37 Ion PGM Hi-Q View OT2 kit, an Ion PGM Hi-Q View Sequencing kit, and a 318 Chip

38 kit v2 (all from Thermo Fisher Scientific Inc., Waltham, MA, USA). The sequence reads  
39 were quality controlled (a quality score < 20) and adapter sequences were removed  
40 using CLC Genomics Workbench version 12 (Qiagen). Using these reads, contigs  
41 (filtered with a size longer than 500 bp) were assembled *de novo* using the same  
42 software with default parameters (mapping mode = Create simple contig sequences  
43 (fast), automatic bubble size = yes, minimum contig length = 500, automatic word size  
44 = yeas, performing scaffolding = yes, auto-detect paired distances = yes). The draft  
45 genomes were annotated using the NCBI Prokaryotic Genome Annotation Pipeline  
46 (PGAP) v4.1 (6).

47 The guanine and cytosine (G+C) content and genome size for these strains were found  
48 to be 58.2–58.8% and 4.9–6.3 Mbp, respectively (Table 1). PGAP identified  
49 5,606–6,432 genes, including multiple rRNA and tRNA genes. In addition, the *argK-tox*  
50 cluster of each strain was sequenced (Table 2) and compared with the reference genome  
51 (CM002753) of ICMP 9617 (pathotype strain of Psa), indicating that some strains have  
52 synonymous substitution (silent mutation) in the cluster. Moreover, in the Ehime  
53 isolates (MAFF 211981 and 211983), it was clarified that a frameshift mutation in the  
54 fatty acid desaturase gene occurred due to a single G insertion, resulting in the loss of  
55 the ability to produce phaseolotoxin. On the chromosomes of MAFF 613017, 613018,  
56 and 212324, the *tox* island containing the *argK-tox* cluster could not be found,

57 suggesting that these strains may not have experienced the island acquisition event. The  
58 fact that such diversification has occurred in the *argK-tox* cluster is an important piece  
59 of evidence for elucidating the pathogenicity, ecology and evolution of Psal.

60

61 **Data availability.** All sequences identified in this study have been deposited in  
62 GenBank (see Tables 1 and 2 for accession numbers).

63

#### 64 **Acknowledgments**

65 We are grateful to Ms. M. Taguchi and Ms. A. Sasaki for supporting this work. We also  
66 thank the members of IFTS-NARO and GRC-NARO for their helpful discussions. We  
67 would like to thank Editage ([www.editage.jp](http://www.editage.jp)) for English language editing. This  
68 research received no specific grant from any funding agency in the public, commercial,  
69 or not-for-profit sectors.

70

#### 71 **References**

- 72 1. Takikawa Y, Serizawa S, Ichikawa T, Tsuyumu S, Goto M. 1989. *Pseudomonas*  
73 *syringae* pv. *actinidiae* pv. nov.: the causal bacterial canker of kiwifruit in Japan.  
74 *Ann Phytopath Soc Japan* 55:437–444.
- 75 2. Sawada H, Fujikawa T. 2019. Genetic diversity of *Pseudomonas syringae* pv.

- 76        *actinidiae*, pathogen of kiwifruit bacterial canker. Plant Pathol 68:1235–1248.
- 77    3. Chapman JR, Taylor RK, Weir BS, Romberg MK, Vanneste JL, Luck J, Alexander  
78        BJR. 2012. Phylogenetic relationships among global populations of *Pseudomonas*  
79        *syringae* pv. *actinidiae*. Phytopathology 102:1034-1044.
- 80    4. Vanneste JL, Yu J, Cornish DA, Tanner DJ, Windner R, Chapman JR, Taylor RK,  
81        Mackay JF, Dowlut S. 2013. Identification, virulence, and distribution of two  
82        biovars of *Pseudomonas syringae* pv. *actinidiae* in New Zealand. Plant Dis  
83        97:708-719.
- 84    5. Miyoshi T, Shimizu S, Sawada H. 2012. Occurrence and distribution of a defective  
85        non-phaseolotoxin-producing mutant of *Pseudomonas syringae* pv. *actinidiae* in  
86        Ehime Prefecture, Japan (in Japanese with English summary). Jpn J Phytopathol  
87        78:92-103.
- 88    6. Tatusova T, DiCuccio M, Badretdin A, Chetvernin V, Nawrocki EP, Zalsavsky L,  
89        Lomsadze A, Pruitt KD, Borodovsky M, Ostell J. 2016. NCBI Prokaryotic Genome  
90        Annotation Pipeline. Nucleic Acids Res 44:6614-6624.

91 **Table 1. Genome data and accession numbers of 10 strains of *Pseudomonas syringae* pv. *actinidiae* biovar 1.**

| Strain information |                            |                             |                | Genome information             |                  |                     |                |          | PGAP <sup>a</sup> annotation |                      |       | Reads information              |              |                     |                     |
|--------------------|----------------------------|-----------------------------|----------------|--------------------------------|------------------|---------------------|----------------|----------|------------------------------|----------------------|-------|--------------------------------|--------------|---------------------|---------------------|
| Strain             | Isolation host             | Isolation area              | Isolation year | GenBank accession no.          | Genome size (bp) | G+C content (mol %) | No. of contigs | $N_{50}$ | Total no. of genes           | rRNAs (5S, 16S, 23S) | tRNAs | SRA <sup>b</sup> accession no. | No. of reads | Average length (bp) | Genome coverage (x) |
| MAFF 302091        | <i>Actinidia deliciosa</i> | Kanagawa Prefecture (Pref.) | 1984           | <a href="#">JAAEYK00000000</a> | 4,916,203        | 58.2                | 2,497          | 2,502    | 6,374                        | 2, 1, 1              | 29    | <a href="#">SRR11730631</a>    | 60,196       | 236                 | 7.7                 |
| MAFF 302133        | <i>A. arguta</i>           | Kanagawa Pref.              | 1987           | <a href="#">JAAEYI00000000</a> | 5,928,911        | 58.8                | 653            | 14,454   | 5,654                        | 3, 1, 1              | 39    | <a href="#">SRR11730639</a>    | 262,576      | 221                 | 26.4                |
| MAFF 302145        | <i>A. deliciosa</i>        | Wakayama Pref.              | 1988           | <a href="#">JAAEYG00000000</a> | 5,164,482        | 58.4                | 2,311          | 3,012    | 6,432                        | 3, 1, 2              | 28    | <a href="#">SRR11730634</a>    | 97,845       | 210                 | 8                   |
| MAFF 613024        | <i>A. deliciosa</i>        | Shizuoka Pref.              | 1995           | <a href="#">JAAEYH00000000</a> | 4,927,103        | 58.2                | 2,470          | 2,552    | 6,335                        | 2, 1, 1              | 28    | <a href="#">SRR11730633</a>    | 57,728       | 235.6               | 7.2                 |
| MAFF 211985        | <i>A. deliciosa</i>        | Ehime Pref.                 | 2000           | <a href="#">SMHD00000000</a>   | 5,951,025        | 58.8                | 475            | 26,121   | 5,880                        | 2, 1, 1              | 44    | <a href="#">SRR11730626</a>    | 286,416      | 231.9               | 100.1               |
| MAFF 211981        | <i>A. deliciosa</i>        | Ehime Pref.                 | 2000           | <a href="#">JAAEYJ00000000</a> | 5,947,905        | 58.8                | 524            | 19,906   | 5,628                        | 3, 1, 1              | 41    | <a href="#">SRR11730636</a>    | 527,346      | 221.5               | 42.3                |

|                |                        |                   |         |                                                     |           |      |       |        |       |         |    |                                                 |         |       |      |
|----------------|------------------------|-------------------|---------|-----------------------------------------------------|-----------|------|-------|--------|-------|---------|----|-------------------------------------------------|---------|-------|------|
| MAFF<br>211983 | A.<br><i>deliciosa</i> | Ehime<br>Pref.    | 2000    | <a href="#">JAAEYF00</a><br><a href="#">0000000</a> | 5,236,580 | 58.4 | 2,155 | 3,303  | 6,342 | 1, 1, 1 | 34 | <a href="#">SRR11730</a><br><a href="#">632</a> | 114,619 | 230.7 | 8.6  |
| MAFF<br>613017 | A.<br><i>deliciosa</i> | Shizuoka<br>Pref. | 1986    | <a href="#">JAAEYL00</a><br><a href="#">0000000</a> | 5,999,477 | 58.8 | 494   | 23,006 | 5,606 | 3, 1, 1 | 44 | <a href="#">SRR11730</a><br><a href="#">635</a> | 813,046 | 215.5 | 65   |
| MAFF<br>613018 | A.<br><i>deliciosa</i> | Shizuoka<br>Pref. | 1986    | <a href="#">JAAEYM00</a><br><a href="#">0000000</a> | 5,821,751 | 58.8 | 1,046 | 9,663  | 5,914 | 1, 1, 1 | 39 | <a href="#">SRR11730</a><br><a href="#">637</a> | 151,420 | 215.5 | 16.3 |
| MAFF<br>212324 | A.<br><i>deliciosa</i> | Shizuoka<br>Pref. | unknown | <a href="#">JAAEYN00</a><br><a href="#">0000000</a> | 6,327,049 | 58.6 | 609   | 17,836 | 6,120 | 2, 1, 1 | 37 | <a href="#">SRR11730</a><br><a href="#">638</a> | 407,967 | 237.2 | 34.9 |

92 <sup>a</sup>NCBI Prokaryote Genome Annotation Pipeline

93 <sup>b</sup>Sequence Read Archive



94 **Table 2. Detail and accession numbers for the *argK-tox* gene cluster of 10 strains of *Pseudomonas syringae* pv. *actinidiae* biovar 1.**

| <i>argK-tox</i> gene cluster information <sup>a</sup> |                         |                              |                                            |                           |
|-------------------------------------------------------|-------------------------|------------------------------|--------------------------------------------|---------------------------|
| Strain                                                | Phaseolotoxin synthesis | <i>argK-tox</i> gene cluster | <i>argK-tox</i> gene cluster accession no. | Detail                    |
| MAFF 302091                                           | +                       | +                            | <a href="#">MT551019</a>                   | Same sequence as ICMP9617 |
| MAFF 302133                                           | +                       | +                            | <a href="#">MT551015</a>                   | Same sequence as ICMP9617 |
| MAFF 302145                                           | +                       | +                            | <a href="#">MT551014</a>                   | Same sequence as ICMP9617 |
| MAFF 613024                                           | +                       | +                            | <a href="#">MT551013</a>                   | Same sequence as ICMP9617 |

|             |   |   |                          |                                                                                                                                                                               |
|-------------|---|---|--------------------------|-------------------------------------------------------------------------------------------------------------------------------------------------------------------------------|
| MAFF 211985 | + | + | <a href="#">MT551017</a> | Synonymous substitution (silent mutation) in some coding genes against ICMP9617                                                                                               |
| MAFF 211981 | - | + | <a href="#">MT551016</a> | Synonymous substitution (silent mutation) in some coding genes against ICMP9617<br>Frameshift mutation in the fatty acid desaturase gene due to the insertion of a single 'G' |
| MAFF 211983 | - | + | <a href="#">MT551018</a> | Synonymous substitution (silent mutation) in some coding genes against ICMP9617<br>Frameshift mutation in the fatty acid desaturase gene due to the insertion of a single 'G' |
| MAFF 613017 | - | - | -                        | Absence of <i>tox</i> island                                                                                                                                                  |
| MAFF 613018 | - | - | -                        | Absence of <i>tox</i> island                                                                                                                                                  |
| MAFF 212324 | - | - | -                        | Absence of <i>tox</i> island                                                                                                                                                  |

95 <sup>a</sup> + denotes presence, - denotes absence

96
